# Supplementary material for: Unmet challenges in treating hypertension in patients with borderline personality disorder: A systematic review
Source: PubMed Central journal article supplement — Medicine (Baltimore). 2019 Sep 13;98(37):e17101. doi: 10.1097/MD.0000000000017101 (PMC6750323; doi:10.1097/md.0000000000017101), 2019-09-13
Supplement: medi-98-e17101-s001.pdf [file medi-98-e17101-s001.pdf]

## Supplemental Table 1. Search strategies and results of the systematic search.

MEDLINE

EMBASE

Cochrane

Pubmed

PsycINFO

Combined searches when duplicates removed

## MEDLINE

Database: Ovid MEDLINE(R) and Epub Ahead of Print, In-Process & Other Non-Indexed Citations and Daily <1946 to September 11, 2018>

Search Strategy:

-----  
1 borderline personality disorder.mp. or exp Borderline Personality Disorder/  
(7795)  
2 ("borderline personality disorder" or ("borderline personality" and ("disorder" or "disease" or "patient" or "patients" or "syndrome" or "symptom" or "symptoms" or "illness" or "trait" or "traits" or "features"))).mp. [mp=title, abstract, original title, name of substance word, subject heading word, floating sub-heading word, keyword heading word, protocol supplementary concept word, rare disease supplementary concept word, unique identifier, synonyms] (8122)  
3 ("undetected" or "undiagnosed" or "underdiagnosed" or "missed diagnosis").mp. [mp=title, abstract, original title, name of substance word, subject heading word, floating sub-heading word, keyword heading word, protocol supplementary concept word, rare disease supplementary concept word, unique identifier, synonyms] (37936)  
4 hypertension.mp. [mp=title, abstract, original title, name of substance word, subject heading word, floating sub-heading word, keyword heading word, protocol supplementary concept word, rare disease supplementary concept word, unique identifier, synonyms] (449970)  
5 ("hypertension" or "acute hypertension" or "chronic hypertension" or "hypertensive emergency" or "hypertensive crisis" or "hypertensive patient" or "hypertensive patients" or "hypertensive urgency" or "hypertensive symptom" or "hypertensive symptoms" or "blood pressure" or "high blood pressure" or "elevated blood pressure").mp. [mp=title, abstract, original title, name of substance word, subject heading word, floating sub-heading word, keyword heading word, protocol supplementary concept word, rare disease supplementary concept word, unique identifier, synonyms] (726230)  
6 ("blood pressure disease" or "blood pressure disorder").mp. [mp=title, abstract, original title, name of substance word, subject heading word, floating sub-heading word, keyword heading word, protocol supplementary concept word, rare disease supplementary concept word, unique identifier, synonyms] (26)  
8 1 or 2 (8122)  
9 3 and 8 (18)  
10 8 or 9 (8122)  
11 4 or 5 or 6 (726230)  
12 3 and 11 (2372)  
13 11 or 12 (726230)  
14 10 and 13 (20)  
\*\*\*\*\*

1. Banny, A.M., et al., Borderline personality features as a predictor of forms and functions of aggression during middle childhood: examining the roles of gender and physiological reactivity. *Development & Psychopathology*, 2014. 26(3): p. 789-804.

2. Chen, M.H., et al., Risk of stroke among patients with borderline personality disorder: A nationwide longitudinal study. *Journal of Affective Disorders*, 2017. 219: p. 80-85.

3. El-Gabalawy, R., L.Y. Katz, and J. Sareen, Comorbidity and associated severity of borderline personality disorder and physical health conditions in a nationally representative sample. *Psychosomatic Medicine*, 2010. 72(7): p. 641-7.
4. Eslami-Shahrbabaki, M., A. Fekrat, and S. Mazhari, A Study of the Prevalence of Psychiatric Disorders in Patients with Methamphetamine-Induced Psychosis. *Addiction & Health*, 2015. 7(1-2): p. 37-46.
5. Frankenburg, F.R. and M.C. Zanarini, The association between borderline personality disorder and chronic medical illnesses, poor health-related lifestyle choices, and costly forms of health care utilization. *Journal of Clinical Psychiatry*, 2004. 65(12): p. 1660-5.
6. Frankenburg, F.R. and M.C. Zanarini, Obesity and obesity-related illnesses in borderline patients. *Journal of Personality Disorders*, 2006. 20(1): p. 71-80.
7. Galle, F., et al., Does Post-operative Psychotherapy Contribute to Improved Comorbidities in Bariatric Patients with Borderline Personality Disorder Traits and Bulimia Tendencies? A Prospective Study. *Obesity Surgery*, 2017. 27(7): p. 1872-1878.
8. Garganeeva, N.P., et al., [Arterial hypertension as a psychosomatic problem]. *Klinicheskaiia Meditsina*, 2004. 82(1): p. 35-41.
9. Golubev, M.V., T.A. Aivazian, and V.P. Zaitsev, [The efficacy of psychotherapy with biofeedback in the rehabilitation of hypertension patients]. *Voprosy Kurortologii, Fizioterapii i Lechebnoi Fizicheskoi Kultury*, 1998(6): p. 16-8.
10. Krol, C.G. and M.J. Janssen, [Unusual use of nutmeg]. *Nederlands Tijdschrift voor Geneeskunde*, 2010. 154: p. A2214.
11. Kuzman, M.R., et al., Psychiatric symptoms in idiopathic intracranial hypertension. *Psychiatry & Clinical Neurosciences*, 2008. 62(3): p. 367.
12. Liebowitz, M.R., et al., Reversible and irreversible monoamine oxidase inhibitors in other psychiatric disorders. *Acta Psychiatrica Scandinavica, Supplementum*, 1990. 360: p. 29-34.
13. Lobbestael, J., et al., Effects of induced anger in patients with antisocial personality disorder. *Psychological Medicine*, 2009. 39(4): p. 557-68.
14. Metzler, W., R. Wronski, and B. Bewig, [The lethal ingestion of cigarettes in adults: does it really exist?]. *Deutsche Medizinische Wochenschrift*, 2005. 130(24): p. 1491-3.
15. Moran, P., et al., Personality disorder and cardiovascular disease: results from a national household survey. *Journal of Clinical Psychiatry*, 2007. 68(1): p. 69-74.
16. Philipsen, A., et al., Clonidine in acute aversive inner tension and self-injurious behavior in female patients with borderline personality disorder. *Journal of Clinical Psychiatry*, 2004. 65(10): p. 1414-9.
17. Schmahl, C.G., et al., Psychophysiological reactivity to traumatic and abandonment scripts in borderline personality and posttraumatic stress disorders: a preliminary report. *Psychiatry Research*, 2004. 126(1): p. 33-42.
18. Schrooten, M., et al., Normalization of 14-3-3 in CJD. *Acta Neurologica Belgica*, 2008. 108(2): p. 64-6.
19. Schulz, B.M. and R.J. Strauch, A case of factitious subfacial emphysema. *Orthopedics*, 2008. 31(5): p. 495.
20. Wingefeld, K., et al., Effects of mineralocorticoid receptor stimulation via fludrocortisone on memory in women with borderline personality disorder. *Neurobiology of Learning & Memory*, 2015. 120: p. 94-100.

## EMBASE

| Embase Session Results (13 Sep 2018) |                                                                                                                                                                                                                                                                                                                                                                                                                                                                                                                                                                                                                                                                                                                                                                                                                                                                                                                       |          |
|--------------------------------------|-----------------------------------------------------------------------------------------------------------------------------------------------------------------------------------------------------------------------------------------------------------------------------------------------------------------------------------------------------------------------------------------------------------------------------------------------------------------------------------------------------------------------------------------------------------------------------------------------------------------------------------------------------------------------------------------------------------------------------------------------------------------------------------------------------------------------------------------------------------------------------------------------------------------------|----------|
| No.                                  | Query                                                                                                                                                                                                                                                                                                                                                                                                                                                                                                                                                                                                                                                                                                                                                                                                                                                                                                                 | Results  |
| #1                                   | 'borderline state'/exp OR 'borderline state'                                                                                                                                                                                                                                                                                                                                                                                                                                                                                                                                                                                                                                                                                                                                                                                                                                                                          | 12235    |
| #2                                   | 'borderline personality disorder':ti,ab,kw                                                                                                                                                                                                                                                                                                                                                                                                                                                                                                                                                                                                                                                                                                                                                                                                                                                                            | 7099     |
| #3                                   | ('borderline state'/exp OR 'borderline state') OR 'borderline personality disorder':ti,ab,kw                                                                                                                                                                                                                                                                                                                                                                                                                                                                                                                                                                                                                                                                                                                                                                                                                          | 12897    |
| #4                                   | 'borderline personality':ti,ab,kw                                                                                                                                                                                                                                                                                                                                                                                                                                                                                                                                                                                                                                                                                                                                                                                                                                                                                     | 8117     |
| #5                                   | 'disorder':ti,ab,kw OR 'disease':ti,ab,kw OR 'patient':ti,ab,kw OR 'patients':ti,ab,kw OR 'syndrome':ti,ab,kw OR 'symptom':ti,ab,kw OR 'symptoms':ti,ab,kw OR 'illness':ti,ab,kw OR 'trait':ti,ab,kw OR 'traits':ti,ab,kw OR 'features':ti,ab,kw                                                                                                                                                                                                                                                                                                                                                                                                                                                                                                                                                                                                                                                                      | 11560515 |
| #6                                   | 'borderline personality':ti,ab,kw AND ('disorder':ti,ab,kw OR 'disease':ti,ab,kw OR 'patient':ti,ab,kw OR 'patients':ti,ab,kw OR 'syndrome':ti,ab,kw OR 'symptom':ti,ab,kw OR 'symptoms':ti,ab,kw OR 'illness':ti,ab,kw OR 'trait':ti,ab,kw OR 'traits':ti,ab,kw OR 'features':ti,ab,kw)                                                                                                                                                                                                                                                                                                                                                                                                                                                                                                                                                                                                                              | 7880     |
| #7                                   | ((('borderline state'/exp OR 'borderline state') OR 'borderline personality disorder':ti,ab,kw) OR ('borderline personality':ti,ab,kw AND ('disorder':ti,ab,kw OR 'disease':ti,ab,kw OR 'patient':ti,ab,kw OR 'patients':ti,ab,kw OR 'syndrome':ti,ab,kw OR 'symptom':ti,ab,kw OR 'symptoms':ti,ab,kw OR 'illness':ti,ab,kw OR 'trait':ti,ab,kw OR 'traits':ti,ab,kw OR 'features':ti,ab,kw)))                                                                                                                                                                                                                                                                                                                                                                                                                                                                                                                        | 14785    |
| #8                                   | 'hypertension'/exp OR 'hypertension'                                                                                                                                                                                                                                                                                                                                                                                                                                                                                                                                                                                                                                                                                                                                                                                                                                                                                  | 912976   |
| #9                                   | 'hypertension':ti,ab,kw OR 'acute hypertension':ti,ab,kw OR 'chronic hypertension':ti,ab,kw OR 'hypertensive emergency':ti,ab,kw OR 'hypertensive crisis':ti,ab,kw OR 'hypertensive patient':ti,ab,kw OR 'hypertensive patients':ti,ab,kw OR 'hypertensive urgency':ti,ab,kw OR 'hypertensive symptom':ti,ab,kw OR 'hypertensive symptoms':ti,ab,kw                                                                                                                                                                                                                                                                                                                                                                                                                                                                                                                                                                   | 553361   |
| #10                                  | 'blood pressure':ti,ab,kw OR 'high blood pressure':ti,ab,kw OR 'elevated blood pressure':ti,ab,kw OR 'blood pressure disease':ti,ab,kw OR 'blood pressure disorder':ti,ab,kw                                                                                                                                                                                                                                                                                                                                                                                                                                                                                                                                                                                                                                                                                                                                          | 387302   |
| #11                                  | ('hypertension'/exp OR 'hypertension') OR ('hypertension':ti,ab,kw OR 'acute hypertension':ti,ab,kw OR 'chronic hypertension':ti,ab,kw OR 'hypertensive emergency':ti,ab,kw OR 'hypertensive crisis':ti,ab,kw OR 'hypertensive patient':ti,ab,kw OR 'hypertensive patients':ti,ab,kw OR 'hypertensive urgency':ti,ab,kw OR 'hypertensive symptom':ti,ab,kw OR 'hypertensive symptoms':ti,ab,kw) OR ('blood pressure':ti,ab,kw OR 'high blood pressure':ti,ab,kw OR 'elevated blood pressure':ti,ab,kw OR 'blood pressure disease':ti,ab,kw OR 'blood pressure disorder':ti,ab,kw)                                                                                                                                                                                                                                                                                                                                     | 1112080  |
| #12                                  | 'undetected':ti,ab,kw OR 'undiagnosed':ti,ab,kw OR 'underdiagnosed':ti,ab,kw OR 'missed diagnosis':ti,ab,kw                                                                                                                                                                                                                                                                                                                                                                                                                                                                                                                                                                                                                                                                                                                                                                                                           | 54229    |
| #13                                  | ((('borderline state'/exp OR 'borderline state') OR 'borderline personality disorder':ti,ab,kw) OR ('borderline personality':ti,ab,kw AND ('disorder':ti,ab,kw OR 'disease':ti,ab,kw OR 'patient':ti,ab,kw OR 'patients':ti,ab,kw OR 'syndrome':ti,ab,kw OR 'symptom':ti,ab,kw OR 'symptoms':ti,ab,kw OR 'illness':ti,ab,kw OR 'trait':ti,ab,kw OR 'traits':ti,ab,kw OR 'features':ti,ab,kw))) AND ('undetected':ti,ab,kw OR 'undiagnosed':ti,ab,kw OR 'underdiagnosed':ti,ab,kw OR 'missed diagnosis':ti,ab,kw)                                                                                                                                                                                                                                                                                                                                                                                                      | 41       |
| #14                                  | ((('borderline state'/exp OR 'borderline state') OR 'borderline personality disorder':ti,ab,kw) OR ('borderline personality':ti,ab,kw AND ('disorder':ti,ab,kw OR 'disease':ti,ab,kw OR 'patient':ti,ab,kw OR 'patients':ti,ab,kw OR 'syndrome':ti,ab,kw OR 'symptom':ti,ab,kw OR 'symptoms':ti,ab,kw OR 'illness':ti,ab,kw OR 'trait':ti,ab,kw OR 'traits':ti,ab,kw OR 'features':ti,ab,kw))) OR (((('borderline state'/exp OR 'borderline state') OR 'borderline personality disorder':ti,ab,kw) OR ('borderline personality':ti,ab,kw AND ('disorder':ti,ab,kw OR 'disease':ti,ab,kw OR 'patient':ti,ab,kw OR 'patients':ti,ab,kw OR 'syndrome':ti,ab,kw OR 'symptom':ti,ab,kw OR 'symptoms':ti,ab,kw OR 'illness':ti,ab,kw OR 'trait':ti,ab,kw OR 'traits':ti,ab,kw OR 'features':ti,ab,kw))) AND ('undetected':ti,ab,kw OR 'undiagnosed':ti,ab,kw OR 'underdiagnosed':ti,ab,kw OR 'missed diagnosis':ti,ab,kw))) | 14785    |

|     |                                                                                                                                                                                                                                                                                                                                                                                                                                                                                                                                                                                                                                                                                                                                                                                                                                                                                                                                                                                                                                                                                                                                                                                                                                                                                                                                                                                                                                                                                                                                                                                                                                                                                                                                                                                                                                                                                                                                                                                                                                                                                                                                                                                                                             |         |
|-----|-----------------------------------------------------------------------------------------------------------------------------------------------------------------------------------------------------------------------------------------------------------------------------------------------------------------------------------------------------------------------------------------------------------------------------------------------------------------------------------------------------------------------------------------------------------------------------------------------------------------------------------------------------------------------------------------------------------------------------------------------------------------------------------------------------------------------------------------------------------------------------------------------------------------------------------------------------------------------------------------------------------------------------------------------------------------------------------------------------------------------------------------------------------------------------------------------------------------------------------------------------------------------------------------------------------------------------------------------------------------------------------------------------------------------------------------------------------------------------------------------------------------------------------------------------------------------------------------------------------------------------------------------------------------------------------------------------------------------------------------------------------------------------------------------------------------------------------------------------------------------------------------------------------------------------------------------------------------------------------------------------------------------------------------------------------------------------------------------------------------------------------------------------------------------------------------------------------------------------|---------|
| #15 | (('hypertension'/exp OR 'hypertension') OR ('hypertension':ti,ab,kw OR 'acute hypertension':ti,ab,kw OR 'chronic hypertension':ti,ab,kw OR 'hypertensive emergency':ti,ab,kw OR 'hypertensive crisis':ti,ab,kw OR 'hypertensive patient':ti,ab,kw OR 'hypertensive patients':ti,ab,kw OR 'hypertensive urgency':ti,ab,kw OR 'hypertensive symptom':ti,ab,kw OR 'hypertensive symptoms':ti,ab,kw) OR ('blood pressure':ti,ab,kw OR 'high blood pressure':ti,ab,kw OR 'elevated blood pressure':ti,ab,kw OR 'blood pressure disease':ti,ab,kw OR 'blood pressure disorder':ti,ab,kw)) AND ('undetected':ti,ab,kw OR 'undiagnosed':ti,ab,kw OR 'underdiagnosed':ti,ab,kw OR 'missed diagnosis':ti,ab,kw)                                                                                                                                                                                                                                                                                                                                                                                                                                                                                                                                                                                                                                                                                                                                                                                                                                                                                                                                                                                                                                                                                                                                                                                                                                                                                                                                                                                                                                                                                                                       | 4771    |
| #16 | (('hypertension'/exp OR 'hypertension') OR ('hypertension':ti,ab,kw OR 'acute hypertension':ti,ab,kw OR 'chronic hypertension':ti,ab,kw OR 'hypertensive emergency':ti,ab,kw OR 'hypertensive crisis':ti,ab,kw OR 'hypertensive patient':ti,ab,kw OR 'hypertensive patients':ti,ab,kw OR 'hypertensive urgency':ti,ab,kw OR 'hypertensive symptom':ti,ab,kw OR 'hypertensive symptoms':ti,ab,kw) OR ('blood pressure':ti,ab,kw OR 'high blood pressure':ti,ab,kw OR 'elevated blood pressure':ti,ab,kw OR 'blood pressure disease':ti,ab,kw OR 'blood pressure disorder':ti,ab,kw)) OR (('hypertension'/exp OR 'hypertension') OR ('hypertension':ti,ab,kw OR 'acute hypertension':ti,ab,kw OR 'chronic hypertension':ti,ab,kw OR 'hypertensive emergency':ti,ab,kw OR 'hypertensive crisis':ti,ab,kw OR 'hypertensive patient':ti,ab,kw OR 'hypertensive patients':ti,ab,kw OR 'hypertensive urgency':ti,ab,kw OR 'hypertensive symptom':ti,ab,kw OR 'hypertensive symptoms':ti,ab,kw) OR ('blood pressure':ti,ab,kw OR 'high blood pressure':ti,ab,kw OR 'elevated blood pressure':ti,ab,kw OR 'blood pressure disease':ti,ab,kw OR 'blood pressure disorder':ti,ab,kw)) AND ('undetected':ti,ab,kw OR 'undiagnosed':ti,ab,kw OR 'underdiagnosed':ti,ab,kw OR 'missed diagnosis':ti,ab,kw)                                                                                                                                                                                                                                                                                                                                                                                                                                                                                                                                                                                                                                                                                                                                                                                                                                                                                                                                | 1112080 |
| #17 | (((('borderline state'/exp OR 'borderline state') OR 'borderline personality disorder':ti,ab,kw) OR ('borderline personality':ti,ab,kw AND ('disorder':ti,ab,kw OR 'disease':ti,ab,kw OR 'patient':ti,ab,kw OR 'patients':ti,ab,kw OR 'syndrome':ti,ab,kw OR 'symptom':ti,ab,kw OR 'symptoms':ti,ab,kw OR 'illness':ti,ab,kw OR 'trait':ti,ab,kw OR 'traits':ti,ab,kw OR 'features':ti,ab,kw))) OR (((('borderline state'/exp OR 'borderline state') OR 'borderline personality disorder':ti,ab,kw) OR ('borderline personality':ti,ab,kw AND ('disorder':ti,ab,kw OR 'disease':ti,ab,kw OR 'patient':ti,ab,kw OR 'patients':ti,ab,kw OR 'syndrome':ti,ab,kw OR 'symptom':ti,ab,kw OR 'symptoms':ti,ab,kw OR 'illness':ti,ab,kw OR 'trait':ti,ab,kw OR 'traits':ti,ab,kw OR 'features':ti,ab,kw))) AND ('undetected':ti,ab,kw OR 'undiagnosed':ti,ab,kw OR 'underdiagnosed':ti,ab,kw OR 'missed diagnosis':ti,ab,kw))) AND (((('hypertension'/exp OR 'hypertension') OR ('hypertension':ti,ab,kw OR 'acute hypertension':ti,ab,kw OR 'chronic hypertension':ti,ab,kw OR 'hypertensive emergency':ti,ab,kw OR 'hypertensive crisis':ti,ab,kw OR 'hypertensive patient':ti,ab,kw OR 'hypertensive patients':ti,ab,kw OR 'hypertensive urgency':ti,ab,kw OR 'hypertensive symptom':ti,ab,kw OR 'hypertensive symptoms':ti,ab,kw) OR ('blood pressure':ti,ab,kw OR 'high blood pressure':ti,ab,kw OR 'elevated blood pressure':ti,ab,kw OR 'blood pressure disease':ti,ab,kw OR 'blood pressure disorder':ti,ab,kw)) OR (('hypertension'/exp OR 'hypertension') OR ('hypertension':ti,ab,kw OR 'acute hypertension':ti,ab,kw OR 'chronic hypertension':ti,ab,kw OR 'hypertensive emergency':ti,ab,kw OR 'hypertensive crisis':ti,ab,kw OR 'hypertensive patient':ti,ab,kw OR 'hypertensive patients':ti,ab,kw OR 'hypertensive urgency':ti,ab,kw OR 'hypertensive symptom':ti,ab,kw OR 'hypertensive symptoms':ti,ab,kw) OR ('blood pressure':ti,ab,kw OR 'high blood pressure':ti,ab,kw OR 'elevated blood pressure':ti,ab,kw OR 'blood pressure disease':ti,ab,kw OR 'blood pressure disorder':ti,ab,kw)) AND ('undetected':ti,ab,kw OR 'undiagnosed':ti,ab,kw OR 'underdiagnosed':ti,ab,kw OR 'missed diagnosis':ti,ab,kw))) | 123     |

1. Afifi, M., Psychiatric morbidity in patients referred to an insomnia clinic [1]. Singapore Medical Journal, 2007. 48(5): p. 479-480.
2. Agarwal, L.J., C.E. Berger, and L. Gill, Naltrexone for severe self-harm behavior: A case report. American Journal of Psychiatry, 2011. 168(4): p. 437-438.

3. Al'Absi, M. and W.R. Lovallo, Cortisol concentrations in serum of borderline hypertensive men exposed to a novel experimental setting. *Psychoneuroendocrinology*, 1993. 18(5-6): p. 355-363.
4. Anglin, R.E., et al., The psychiatric manifestations of mitochondrial disorders: A case and review of the literature. *Journal of Clinical Psychiatry*, 2012. 73(4): p. 506-512.
5. Ansermot, N., et al., Severe manic episode associated with tramadol in a patient with recurrent depressive disorder. *Journal of Clinical Psychopharmacology*, 2015. 35(2): p. 203-204.
6. Argentieri, M.A., et al., Epigenetic Pathways in Human Disease: The Impact of DNA Methylation on Stress-Related Pathogenesis and Current Challenges in Biomarker Development. *EBioMedicine*, 2017. 18: p. 327-350.
7. Balon, R., Quo vadis, Psychiatry? *Current Psychiatry*, 2016. 15(2): p. 25 and 39.
8. Balon, R., Clinical Factor 2016. *Psychotherapy and Psychosomatics*, 2017. 86(6): p. 323-331.
9. Bandali, F., Z. Thomas, and Y. Gozzo, Conservative management of massive rivaroxaban and enoxaparin overdose. *Critical Care Medicine*, 2014. 42(12): p. A1642.
10. Banny, A.M., et al., Borderline personality features as a predictor of forms and functions of aggression during middle childhood: examining the roles of gender and physiological reactivity. *Development and psychopathology*, 2014. 26(3): p. 789-804.
11. Bates, D. and B. Caton, Metformin overdose [2]. *Canadian Journal of Hospital Pharmacy*, 1999. 52(3): p. 173-175.
12. Baweja, R., R. Baweja, and A. Hameed, Munchausen's syndrome with rare hematological disorder, systemic mastocytosis: A case report. *Journal of Neuropsychiatry and Clinical Neurosciences*, 2013. 25(3): p. E35-E38.
13. Beck, A.T. and D.J.A. Dozois, Cognitive therapy: Current status and future directions. 2011. p. 397-409.
14. Bitter, R., T.L. Demler, and L. Opler, Safety evaluation of the concomitant use of clozapine and benzodiazepines: A retrospective, cross-sectional chart review. *Journal of Psychiatric Practice*, 2008. 14(5): p. 265-270.
15. Bohinc, R.J., R.A. Sansone, and S. McDonald, Multiple invasive procedures in a patient with borderline personality: A relationship? *Innovations in Clinical Neuroscience*, 2014. 11(3-4): p. 10-11.
16. Boon, D., R.A. Kraaijenhagen, and G.A. Van Montfrans, Factitious pheochromocytoma-like hypertensive bouts caused by the valsalva maneuver [11]. *Annals of Internal Medicine*, 2001. 135(4): p. 304-305.
17. Bowditch, J., R. Russell, and S. McCready, General anaesthesia for caesarean section in a woman with tuberous sclerosis. *International Journal of Obstetric Anesthesia*, 2017. 31: p. 110-111.
18. Buist, A.E. and J. Bilszta, Perinatal mental illness: Identifying and managing women at risk. *Medicine Today*, 2011. 12(1): p. 64-68.
19. Chapman, C.D., et al., Intranasal treatment of central nervous system dysfunction in humans. *Pharmaceutical Research*, 2013. 30(10): p. 2475-2484.
20. Chen, M.H., et al., Risk of stroke among patients with borderline personality disorder: A nationwide longitudinal study. *Journal of Affective Disorders*, 2017. 219: p. 80-85.
21. Citrome, L., Binge-eating disorder and comorbid conditions: Differential diagnosis and implications for treatment. *Journal of Clinical Psychiatry*, 2017. 78: p. 9-13.
22. Collin-Lévesque, L., et al., Infant Exposure to Methylphenidate and Duloxetine during Lactation. *Breastfeeding Medicine*, 2018. 13(3): p. 221-225.

23. Cornett, E.M., et al., Medication-induced tardive dyskinesia: A review and update. *Ochsner Journal*, 2017. 17(2): p. 162-174.
24. Cortazar, F., et al., Clinical outcomes in kidney transplant recipients receiving long-term therapy with inhibitors of the mammalian target of rapamycin. *American Journal of Transplantation*, 2012. 12(2): p. 379-387.
25. Cuadra, R.H. and W.B. White, Severe and refractory hypertension in a young woman. *Journal of the American Society of Hypertension*, 2016. 10(6): p. 506-509.
26. Danilov, D.S., The efficacy and tolerability of pericyazine in the treatment of patients with schizotypal disorder, organic personality disorders and pathocharacterological changes within personality disorders. *Zhurnal Nevrologii i Psihiatrii imeni S.S. Korsakova*, 2017. 117(10): p. 65-71.
27. De Faire, U., K. Lindvall, and B. Nilsson, Noninvasive ambulatory 24 h blood pressures and basal blood pressures predict development of sustained hypertension from a borderline state. *American Journal of Hypertension*, 1993. 6(2): p. 149-155.
28. Drummond, P.D., Cardiovascular reactivity in borderline hypertensives during behavioural and orthostatic stress. *Psychophysiology*, 1985. 22(6): p. 621-628.
29. Dullur, P., V. Eapen, and T. Trapolini, Metabolic syndrome in an adolescent psychiatric unit. *Australasian Psychiatry*, 2012. 20(5): p. 444-445.
30. Durham, J.D., R.R. Arthur Grube, and S.H. Fuller, Borderline personality disorder. 2007. p. 52-58.
31. Durmaz, O., Finding the right balance between clinical efficacy and side effects in second generation antipsychotics. *Klinik Psikofarmakoloji Bulteni*, 2016. 26(1): p. 89-90.
32. El-Gabalawy, R., L.Y. Katz, and J. Sareen, Comorbidity and associated severity of borderline personality disorder and physical health conditions in a nationally representative sample. *Psychosomatic Medicine*, 2010. 72(7): p. 641-647.
33. Elgarov, A.A., et al., Epidemiology of ischemic heart disease and atherosclerosis risk factors in imprisoned men. *Russian Journal of Cardiology*, 2015. 122(6): p. 42-47.
34. Faith, M.S., P.E. Matz, and M.A. Jorge, Obesity - Depression associations in the population. *Journal of Psychosomatic Research*, 2002. 53(4): p. 935-942.
35. Falkai, P. and H.J. Möller, Mood disorders in the light of genes, comorbidity and contemporary treatment. *European Archives of Psychiatry and Clinical Neuroscience*, 2011. 261(8): p. 531-532.
36. Fawcett, J., Why aren't MAOIs used more often? *Journal of Clinical Psychiatry*, 2009. 70(1): p. 139-140.
37. Foti, M.E., et al., Borderline personality disorder: Considerations for inclusion in the Massachusetts Parity List of "Biologically-based" disorders. *Psychiatric Quarterly*, 2011. 82(2): p. 95-112.
38. Frankenburg, F.R. and M.C. Zanarini, The association between borderline personality disorder and chronic medical illnesses, poor health-related lifestyle choices, and costly forms of health care utilization. *The Journal of clinical psychiatry*, 2004. 65(12): p. 1660-1665.
39. Frankenburg, F.R. and M.C. Zanarini, Obesity and obesity-related illnesses in borderline patients. *Journal of Personality Disorders*, 2006. 20(1): p. 71-80.
40. Franklin, C., et al., Ulcerated necrobiosis lipoidica as a rare cause for chronic leg ulcers: Case report series of ten patients. *International Wound Journal*, 2015. 12(5): p. 548-554.
41. Franklin, L.D. and S.A. Swan, Psychodynamic Treatment of Excessive Virtual Reality Environment Use. *Clinical Case Studies*, 2015. 14(6): p. 482-493.

42. Franz, I.W., Investigations of the blood pressure during and after ergometric work in borderline hypertensives in comparison with normal subjects and patients with stable hypertension. *Zeitschrift fur Kardiologie*, 1979. 68(2): p. 107-115.
43. Gagnon, J. and S. Daelman, An empirical study of the psychodynamics of borderline impulsivity: A preliminary report. *Psychoanalytic Psychology*, 2011. 28(3): p. 341-362.
44. Gallé, F., et al., Does Post-operative Psychotherapy Contribute to Improved Comorbidities in Bariatric Patients with Borderline Personality Disorder Traits and Bulimia Tendencies? A Prospective Study. *Obesity Surgery*, 2017. 27(7): p. 1872-1878.
45. Garganeeva, N.P., et al., Arterial hypertension as a psychosomatic problem. *Klinicheskaia meditsina*, 2004. 82(1): p. 35-41.
46. Garganeyeva, N.P., et al., Disorders of neurotic and affective level in assessment of cardio-vascular risk in patients with arterial hypertension. *European Neuropsychopharmacology*, 2009. 19: p. S702-S703.
47. Geiss, L., et al., Reduced autonomic modulation of blood pressure and shifted sympatho-vagal balance in borderline personality disorder. *Neurology Psychiatry and Brain Research*, 2018. 29: p. 9.
48. Gjone, H. and V.B. Wyller, Chronic fatigue in adolescence - Autonomic dysregulation and mental health: An exploratory study. *Acta Paediatrica, International Journal of Paediatrics*, 2009. 98(8): p. 1313-1318.
49. Goedhard, L.E., et al., Pharmacotherapy for the treatment of aggressive behavior in general adult psychiatry: A systematic review. *Journal of Clinical Psychiatry*, 2006. 67(7): p. 1013-1024.
50. Goethe, J.W., B.L. Szarek, and C.F. Caley, Metabolic syndrome in psychiatric inpatients treated for depression. 2009. p. 90-104.
51. Golubev, M.V., T.A. Aivazian, and V.P. Zaitsev, The efficacy of psychotherapy with biofeedback in the rehabilitation of hypertension patients. *Voprosy kurortologii, fizioterapii, i lechebnoi fizicheskoi kultury*, 1998(6): p. 16-18.
52. Gordon, A., et al., Prescribing opioids for chronic noncancer pain in primary care: Risk assessment. *Postgraduate Medicine*, 2014. 126(5): p. 159-166.
53. Greggersen, W., et al., Intima-media thickness in women with borderline personality disorder. *Psychosomatic Medicine*, 2011. 73(7): p. 627-632.
54. Greggersen, W., et al., Major depression, borderline personality disorder, and visceral fat content in women. *European Archives of Psychiatry and Clinical Neuroscience*, 2011. 261(8): p. 551-557.
55. Grgas, M., Treatment of tardive akathisia associated with clozapine with high dose propranolol. *Journal of Pharmacy Practice*, 2016. 29(3): p. 341.
56. Grove, J.L., T.W. Smith, and K.D. Jordan, BPD symptomatology and risk for cardiovascular disease: Heightened physiological reactivity as a mechanism. *Psychosomatic Medicine*, 2014. 76(3): p. A-43.
57. Gunderson, J.G., Borderline personality disorder. *New England Journal of Medicine*, 2011. 364(21): p. 2037-2042.
58. Gupta, S., et al., Functional pituitary tumors masquerading as primary glaucoma and effect of hypophysectomy on intraocular tension. *Journal of Glaucoma*, 2015. 24(3): p. e7-e13.
59. Ho, C.S.H., et al., Metabolic syndrome in psychiatry: Advances in understanding and management. *Advances in Psychiatric Treatment*, 2014. 20(2): p. 101-112.
60. Hughes, A. and S. Mazor, Truth is stranger than Pulp Fiction: A shot of adrenaline and a broken heart. *Clinical Toxicology*, 2017. 55(7): p. 775-776.



61. Jain, S., et al., Polycystic ovarian syndrome in borderline personality disorder. *Indian Journal of Psychiatry*, 2015. 57(5): p. S73.
62. John, A.P., et al., Prevalence of metabolic syndrome among Australians with severe mental illness. *Medical Journal of Australia*, 2009. 190(4): p. 176-179.
63. Kahl, K., et al., Prevalence of the metabolic syndrome in patients with borderline personality disorders - Results of a cross-sectional study. *European Psychiatry*, 2011. 26.
64. Kahl, K.G., et al., Visceral fat deposition and insulin sensitivity in depressed women with and without comorbid borderline personality disorder. *Psychosomatic Medicine*, 2005. 67(3): p. 407-412.
65. Kahl, K.G., et al., Prevalence of the metabolic syndrome in patients with borderline personality disorder: Results from a cross-sectional study. *European Archives of Psychiatry and Clinical Neuroscience*, 2013. 263(3): p. 205-213.
66. Kambhampati, R., A. Khan, and M. Patel, Drug reaction dressed up as severe sepsis. *Journal of General Internal Medicine*, 2015. 30: p. S390.
67. Kataoka, J. and S. Suzaki, Severe carbamazepine poisoning managed with charcoal hemoperfusion and multiple-dose activated charcoal. *Critical Care Medicine*, 2012. 40(12): p. 302.
68. Kato, M. and T. Atsumi, Pulmonary arterial hypertension associated with connective tissue diseases: A review focusing on distinctive clinical aspects. *European Journal of Clinical Investigation*, 2018. 48(2).
69. Keeris, L., et al., Fatal hypoglycemia; CT and MR findings of the brain. *Intensive Care Medicine*, 2009. 35: p. S140.
70. Krol, C.G. and M.J. Janssen, [Unusual use of nutmeg]. *Nederlands tijdschrift voor geneeskunde*, 2010. 154(36): p. A2214.
71. Lacy, T.J. and M.J. Higgins, Integrated medical-psychiatric care of a dying borderline patient: A case of dynamically informed "practical psychotherapy". *Journal of the American Academy of Psychoanalysis and Dynamic Psychiatry*, 2005. 33(4): p. 619-636.
72. Ladea, M., et al., Acute psychotic disorder due to the use of ethnobotanical substances. *European Neuropsychopharmacology*, 2010. 20: p. S606.
73. Lantz, M.S., Borderline personality disorder in an older woman. *Clinical Geriatrics*, 2009. 17(6): p. 9-12.
74. Larrivé, M.P., Borderline personality disorder in adolescents: The He-who-must-not-be-named of psychiatry. *Dialogues in Clinical Neuroscience*, 2013. 15(2): p. 171-179.
75. Liebowitz, M.R., et al., Reversible and irreversible monoamine oxidase inhibitors in other psychiatric disorders. *Acta Psychiatrica Scandinavica, Supplement*, 1990. 82(360): p. 29-34.
76. Lipinski, M.J., et al., An unusual presentation of ehlers-danlos syndrome vascular type with deep vein thrombosis: A case for multidisciplinary management. *American Journal of Medical Genetics, Part A*, 2009. 149(4): p. 698-701.
77. Lobbstaël, J., et al., Effects of induced anger in patients with antisocial personality disorder. *Psychological Medicine*, 2009. 39(4): p. 557-568.
78. Manickam, B., et al., Relationship between glycated hemoglobin and circulating 25-hydroxyvitamin D concentration in African American and Caucasian American men. *Endocrine Practice*, 2013. 19(1): p. 73-80.
79. Marginean, C.N., et al., Case-report of Acute intermittent porphyria presenting with behavioral disturbances. *European Neuropsychopharmacology*, 2008. 18(S4): p. S580-S581.

80. Martinez-Raga, J., et al., Risk of serious cardiovascular problems with medications for attention-deficit hyperactivity disorder. *CNS Drugs*, 2013. 27(1): p. 15-30.
81. Mehrmann, C. and R. Karmacharya, Principles and neurobiological correlates of concentrative, diffuse, and insight meditation. *Harvard Review of Psychiatry*, 2013. 21(4): p. 205-218.
82. Meng, L., et al., Original rat model of high kinetic unilateral pulmonary hypertension surgically induced by combined surgery. *Journal of Thoracic and Cardiovascular Surgery*, 2013. 146(5): p. 1220-1226.e1.
83. Metzler, W., R. Wronski, and B. Bewig, The lethal ingestion of cigarettes in adults: Does it really exist? *Deutsche Medizinische Wochenschrift*, 2005. 130(24): p. 1491-1493.
84. Milano, G., et al., Clinical experience about an unexpected adverse event during nalmefene treatment in two patients with alcohol use disorder. *Journal of Clinical Pharmacy and Therapeutics*, 2016. 41(1): p. 97-100.
85. Miyake, N., et al., X-linked hypomyelination with spondylometaphyseal dysplasia (H-SMD) associated with mutations in AIFM1. *Neurogenetics*, 2017. 18(4): p. 185-194.
86. Mohammadi, D., Gisèle Apter: Thinking in twos and threes. *The Lancet Psychiatry*, 2016. 3(3): p. 209.
87. Moran, P., et al., Personality disorder and cardiovascular disease: Results from a National household survey. *Journal of Clinical Psychiatry*, 2007. 68(1): p. 69-74.
88. Morrison, M.L., et al., Prevalence of left ventricular hypertrabeculation/noncompaction among children with sickle cell disease. *Congenital Heart Disease*, 2018. 13(3): p. 440-443.
89. Morrison, R.L. and A.S. Bellack, Role of social competence in borderline essential hypertension. *Journal of Consulting and Clinical Psychology*, 1985. 53(2): p. 248-255.
90. Munro, J., et al., Relaxin polymorphisms associated with metabolic disturbance in patients treated with antipsychotics. *Journal of Psychopharmacology*, 2012. 26(3): p. 374-379.
91. Mushtaq, R., et al., Relationship between loneliness, Psychiatric disorders and physical health ? A review on the psychological aspects of loneliness. *Journal of Clinical and Diagnostic Research*, 2014. 8(9): p. WE01-WE04.
92. Naguy, A. and D. El-Sori, Metformin for Antipsychotic-Related Metabolic Syndrome in Children: Fact or Fiction? *Chinese Medical Journal*, 2018. 131(12): p. 1490-1491.
93. Nasrallah, H.A., Pleiotropy of psychiatric disorders will reinvent DSM. *Current Psychiatry*, 2013. 12(4): p. 6-7.
94. Osman, O.T., et al., The psychiatric aspects of skin disorders. *Expert Review of Dermatology*, 2011. 6(2): p. 195-209.
95. Osview, F., Antiepileptic drugs in psychiatry. *Journal of Neurology, Neurosurgery and Psychiatry*, 2004. 75(12): p. 1655-1658.
96. Pallarés-Carratalá, V. and R. Pascual Pérez, Non-compliance and therapeutic inertia: Two unanswered questions in clinical practice. *Current Medical Research and Opinion*, 2014. 30(5): p. 839-840.
97. Pattishall, A.E., S.B. Ellen, and N.D. Spector, Bullying, adverse childhood experiences and use of texting to promote behavior change. *Current Opinion in Pediatrics*, 2013. 25(6): p. 748-754.
98. Peterhänsel, C., et al., Obesity and co-morbid psychiatric disorders as contraindications for bariatric surgery? - A case study. *International Journal of Surgery Case Reports*, 2014. 5(12): p. 1268-1270.
99. Philipsen, A., et al., Clonidine in acute aversive inner tension and self-injurious behavior in female patients with borderline personality disorder. *The Journal of clinical psychiatry*, 2004. 65(10): p. 1414-1419.

100. Pittenger, C., et al., Riluzole in the treatment of mood and anxiety disorders. *CNS Drugs*, 2008. 22(9): p. 761-786.
101. Posse, P.R., et al., Cardiovascular effects of intravenous ketamine for depression: Analysis of 684 consecutive infusions. *Neuropsychopharmacology*, 2017. 43: p. S168.
102. Pouwer, F., et al., Schizophrenia, syndrome X, and omega-3 fatty acids [3]. *American Journal of Psychiatry*, 2004. 161(10): p. 1926.
103. Raffai, G., et al., Experimental orthostasis elicits sustained hypertension, which can be prevented by sympathetic blockade in the rat. *Journal of Cardiovascular Pharmacology*, 2005. 45(4): p. 354-361.
104. Safar, M.E., Y.A. Weiss, and G.M. London, Cardiopulmonary blood volume in borderline hypertension. *Clinical Science and Molecular Medicine*, 1974. 47(2): p. 153-164.
105. Samardzic, R., Posttraumatic depression: Issue of comorbidity. *European Psychiatry*, 2012. 27.
106. Savage, S.E., On medication through adolescence after transplantation. *Chronic Illness*, 2010. 6(4): p. 317-319.
107. Schaffer, A., et al., A review of factors associated with greater likelihood of suicide attempts and suicide deaths in bipolar disorder: Part II of a report of the International Society for Bipolar Disorders Task Force on Suicide in Bipolar Disorder. *Australian and New Zealand Journal of Psychiatry*, 2015. 49(11): p. 1006-1020.
108. Schmahl, C.G., B.M. Elzinga, and J.D. Bremner, Individual differences in psychophysiological reactivity in adults with childhood abuse. *Clinical Psychology and Psychotherapy*, 2002. 9(4): p. 271-276.
109. Schmahl, C.G., et al., Psychophysiological reactivity to traumatic and abandonment scripts in borderline personality and posttraumatic stress disorders: A preliminary report. *Psychiatry Research*, 2004. 126(1): p. 33-42.
110. Schmitt, A. and P. Falkai, Risk genes, metabolic syndrome and eye tracking deficits in psychiatric diseases. *European Archives of Psychiatry and Clinical Neuroscience*, 2013. 263(3): p. 177-179.
111. Schulz, B.M. and R.J. Strauch, A case of factitious subfascial emphysema. *Orthopedics*, 2008. 31(5): p. 495.
112. Shankar, K., et al., Eating behaviors in borderline personality disorder and its association with metabolic abnormalities. *Indian Journal of Psychiatry*, 2014. 56: p. S52.
113. Short, J., Women. *Criminal Behaviour and Mental Health*, 2004. 14(2 SPEC. SUPPL.): p. S48-S50.
114. So, Y.T., Immune-mediated neuropathies. *CONTINUUM Lifelong Learning in Neurology*, 2012. 18(1): p. 85-105.
115. Stock, S., et al., Risk factors for the prescription of potentially inappropriate medication (PIM) in the elderly: An analysis of sickness fund routine claims data from Germany. *Wiener Klinische Wochenschrift*, 2014. 126(19-20): p. 604-612.
116. Stoner, S.C., et al., Levetiracetam for mood stabilization and maintenance of seizure control following multiple treatment failure. *Annals of Pharmacotherapy*, 2005. 39(11): p. 1928-1931.
117. Tyrka, A.R., et al., The neurobiological correlates of childhood adversity and implications for treatment. *Acta Psychiatrica Scandinavica*, 2013. 128(6): p. 434-447.
118. van Meerkerk-Aanen, P.J., et al., La belle indifférence revisited: A case report on progressive supranuclear palsy misdiagnosed as conversion disorder. *Neuropsychiatric Disease and Treatment*, 2017. 13: p. 2057-2067.
119. Van Merode, T., et al., Local inhomogeneities in wall distensibility in the carotid artery bifurcation in borderline hypertensives. *Journal of Hypertension*, 1991. 9(SUPPL. 6): p. S118-S119.

120. Vukić, V., D. Karlović, and D. Buljan, Past research and cognitions of quetiapine use in the treatment of Alcohol dependence. *Alcoholism*, 2011. 47(1): p. 43-52.
121. Weidmann, P. and Z. Gluck, Borderline hypertension. *Schweizerische Medizinische Wochenschrift*, 1979. 109(12): p. 417-422.
122. White, H.L. and J.A. Ascher, Preclinical and early clinical studies with BW 1370U87, a reversible competitive monoamine oxidase-A inhibitor. *Clinical Neuropharmacology*, 1993. 16(SUPPL. 2): p. S25-S33.
123. Wong, L.Y., et al., Severe Hypertension and Bradycardia Secondary to Midodrine Overdose. *Journal of Medical Toxicology*, 2017. 13(1): p. 88-90.

## Cochrane

Cochrane search 20180913

- #1 MeSH descriptor: [Borderline Personality Disorder] explode all trees (370)
- #2 (“borderline personality disorder”):ti;ab;kw OR (“borderline personality disease”):ti;ab;kw OR (“borderline personality patient”):ti;ab;kw OR (“borderline personality patients”):ti;ab;kw OR (“borderline personality syndrome”):ti;ab;kw (590)
- #3 (“borderline personality symptom”):ti;ab;kw OR (“borderline personality symptoms”):ti;ab;kw OR (“borderline personality illness”):ti;ab;kw OR (“borderline personality trait”):ti;ab;kw OR (“borderline personality traits”):ti;ab;kw (10)
- #4 (“borderline personality features”):ti;ab;kw (9)
- #5 (“undetected”):ti;ab;kw OR (“undiagnosed”):ti;ab;kw OR (“underdiagnosed”):ti;ab;kw OR (“missed diagnosis”):ti;ab;kw (1378)
- #6 #1 or #2 or #3 or #4 (594)
- #7 #5 or #6 (0)
- #8 #6 or #7 (594)
- #9 MeSH descriptor: [Hypertension] explode all trees (16454)
- #10 (“hypertension”):ti;ab;kw OR (“acute hypertension”):ti;ab;kw OR (“chronic hypertension”):ti;ab;kw OR (“hypertensive emergency”):ti;ab;kw OR (“hypertensive crisis”):ti;ab;kw (47243)
- #11 (“hypertensive patient”):ti;ab;kw OR (“hypertensive patients”):ti;ab;kw OR (“hypertensive urgency”):ti;ab;kw OR (“hypertensive symptom”):ti;ab;kw OR (“hypertensive symptoms”):ti;ab;kw (7474)
- #12 (“high blood pressure”):ti;ab;kw OR (“elevated blood pressure”):ti;ab;kw OR (“blood pressure disorder”):ti;ab;kw (2883)
- #13 (“blood pressure”):ti;ab;kw (68226)
- #14 #9 or #10 or #11 or #12 or #13 (92834)
- #15 #5 and #16 (137)
- #16 #14 and #15 (92834)
- #13 #8 and #16 (8)

1. Black, D.W., et al., Comparison of low and moderate dosages of extended-release quetiapine in borderline personality disorder: a randomized, double-blind, placebo-controlled trial. *American journal of psychiatry*, 2014. 171(11): p. 1174-1182.
2. Galle, F., et al., Does Post-operative Psychotherapy Contribute to Improved Comorbidities in Bariatric Patients with Borderline Personality Disorder Traits and Bulimia Tendencies? A Prospective Study. *Obesity surgery*, 2017. 27(7): p. 1872-1878.

3. Golubev, M.V., T.A. Aivazian, and V.P. Zaitsev, The efficacy of psychotherapy with biofeedback in the rehabilitation of hypertension patients. *Voprosy kurortologii, fizioterapii, i lechebnoi fizicheskoi kultury*, 1998(6): p. 16-18.
4. Nct, Clinical Research Study to Evaluate Selegiline in the Treatment of Borderline Personality Disorder. <https://clinicaltrials.gov/show/nct01912391>, 2013.
5. Philipsen, A., et al., Clonidine in acute aversive inner tension and self-injurious behavior in female patients with borderline personality disorder. *Journal of clinical psychiatry*, 2004. 65(10): p. 1414-1419.
6. Reynolds, D., et al., Ipsapirone as a serotonergic probe in personality disorder patients. *Biological psychiatry*, 2000. 47(8 Suppl 1): p. S144.
7. Schmahl, C.G., et al., Psychophysiological reactivity to traumatic and abandonment scripts in borderline personality and posttraumatic stress disorders: a preliminary report. *Psychiatry research*, 2004. 126(1): p. 33-42.
8. Wingenfeld, K., et al., Effects of mineralocorticoid receptor stimulation via fludrocortisone on memory in women with borderline personality disorder. *Neurobiology of learning and memory*, 2015. 120: p. 94-100.

Pubmed

| Recent queries in pubmed 20180913 |                                                                                                                                                                                                                                                                                                                                                                                                                                                                                                                                                                                                                                                                                                                                                            |             |
|-----------------------------------|------------------------------------------------------------------------------------------------------------------------------------------------------------------------------------------------------------------------------------------------------------------------------------------------------------------------------------------------------------------------------------------------------------------------------------------------------------------------------------------------------------------------------------------------------------------------------------------------------------------------------------------------------------------------------------------------------------------------------------------------------------|-------------|
| Search                            | Query                                                                                                                                                                                                                                                                                                                                                                                                                                                                                                                                                                                                                                                                                                                                                      | Items found |
| #1                                | Search (((borderline personality disorder[MeSH Terms]) OR "borderline personality disorder")) OR (("borderline personality") AND (((((((("disorder") OR "disease") OR "patient") OR "patients") OR "syndrome") OR "symptom") OR "symptoms") OR "illness") OR "trait") OR "traits") OR "features"))                                                                                                                                                                                                                                                                                                                                                                                                                                                         | 8100        |
| #2                                | Search (((undetected") OR "undiagnosed") OR "underdiagnosed") OR "missed diagnosis"                                                                                                                                                                                                                                                                                                                                                                                                                                                                                                                                                                                                                                                                        | 38012       |
| #3                                | Search (((("undetected") OR "undiagnosed") OR "underdiagnosed") OR "missed diagnosis")) AND (((borderline personality disorder[MeSH Terms]) OR "borderline personality disorder")) OR (("borderline personality") AND (((((((("disorder") OR "disease") OR "patient") OR "patients") OR "syndrome") OR "symptom") OR "symptoms") OR "illness") OR "trait") OR "traits") OR "features"))                                                                                                                                                                                                                                                                                                                                                                    | 18          |
| #4                                | Search (((borderline personality disorder[MeSH Terms]) OR "borderline personality disorder")) OR (("borderline personality") AND (((((((("disorder") OR "disease") OR "patient") OR "patients") OR "syndrome") OR "symptom") OR "symptoms") OR "illness") OR "trait") OR "traits") OR "features")) OR (((("undetected") OR "undiagnosed") OR "underdiagnosed") OR "missed diagnosis")) AND (((borderline personality disorder[MeSH Terms]) OR "borderline personality disorder")) OR (("borderline personality") AND (((((((("disorder") OR "disease") OR "patient") OR "patients") OR "syndrome") OR "symptom") OR "symptoms") OR "illness") OR "trait") OR "traits") OR "features"))                                                                     | 8100        |
| #5                                | Search (((Hypertension[MeSH Terms]) OR "hypertension") OR "acute hypertension") OR "chronic hypertension"                                                                                                                                                                                                                                                                                                                                                                                                                                                                                                                                                                                                                                                  | 471072      |
| #6                                | Search (((("emergency") OR "crisis") OR "patient") OR "patients") OR "urgency") OR "symptom") OR "symptoms"                                                                                                                                                                                                                                                                                                                                                                                                                                                                                                                                                                                                                                                | 6781714     |
| #7                                | Search ("hypertensive") AND (((((((("emergency") OR "crisis") OR "patient") OR "patients") OR "urgency") OR "symptom") OR "symptoms"))                                                                                                                                                                                                                                                                                                                                                                                                                                                                                                                                                                                                                     | 53284       |
| #8                                | Search (("high blood pressure") OR "elevated blood pressure") OR "blood pressure"                                                                                                                                                                                                                                                                                                                                                                                                                                                                                                                                                                                                                                                                          | 419835      |
| #9                                | Search (((((((Hypertension[MeSH Terms]) OR "hypertension") OR "acute hypertension") OR "chronic hypertension")) OR ("hypertensive") AND (((((((("emergency") OR "crisis") OR "patient") OR "patients") OR "urgency") OR "symptom") OR "symptoms")) OR (((("high blood pressure") OR "elevated blood pressure") OR "blood pressure"))                                                                                                                                                                                                                                                                                                                                                                                                                       | 748417      |
| #10                               | Search (((("undetected") OR "undiagnosed") OR "underdiagnosed") OR "missed diagnosis")) AND (((((((Hypertension[MeSH Terms]) OR "hypertension") OR "acute hypertension") OR "chronic hypertension")) OR ("hypertensive") AND (((((((("emergency") OR "crisis") OR "patient") OR "patients") OR "urgency") OR "symptom") OR "symptoms")) OR (((("blood pressure") OR "high blood pressure") OR "elevated blood pressure"))                                                                                                                                                                                                                                                                                                                                  | 2434        |
| #11                               | Search (((((((Hypertension[MeSH Terms]) OR "hypertension") OR "acute hypertension") OR "chronic hypertension")) OR ("hypertensive") AND (((((((("emergency") OR "crisis") OR "patient") OR "patients") OR "urgency") OR "symptom") OR "symptoms")) OR (((("blood pressure") OR "high blood pressure") OR "elevated blood pressure")) OR (((("undetected") OR "undiagnosed") OR "underdiagnosed") OR "missed diagnosis")) AND (((((((Hypertension[MeSH Terms]) OR "hypertension") OR "acute hypertension") OR "chronic hypertension")) OR ("hypertensive") AND (((((((("emergency") OR "crisis") OR "patient") OR "patients") OR "urgency") OR "symptom") OR "symptoms")) OR (((("blood pressure") OR "high blood pressure") OR "elevated blood pressure")) | 748417      |

|         |                                                                                                                                                                                                                                                                                                                                                                                                                                                                                                                                                                                                                                                                                                                                                                                                                                                                                                                                                                                                                                                                                                                                                                                                                                                                                                                                                                                                                                                                        |    |
|---------|------------------------------------------------------------------------------------------------------------------------------------------------------------------------------------------------------------------------------------------------------------------------------------------------------------------------------------------------------------------------------------------------------------------------------------------------------------------------------------------------------------------------------------------------------------------------------------------------------------------------------------------------------------------------------------------------------------------------------------------------------------------------------------------------------------------------------------------------------------------------------------------------------------------------------------------------------------------------------------------------------------------------------------------------------------------------------------------------------------------------------------------------------------------------------------------------------------------------------------------------------------------------------------------------------------------------------------------------------------------------------------------------------------------------------------------------------------------------|----|
| #1<br>2 | Search (((((((borderline personality disorder[MeSH Terms]) OR "borderline personality disorder"))) OR (("borderline personality") AND (((((((("disorder") OR "disease") OR "patient") OR "patients") OR "syndrome") OR "symptom") OR "symptoms") OR "illness") OR "trait") OR "traits") OR "features")))) OR (((("undetected") OR "undiagnosed") OR "underdiagnosed") OR "missed diagnosis")) AND (((borderline personality disorder[MeSH Terms]) OR "borderline personality disorder"))) OR (("borderline personality") AND (((((((("disorder") OR "disease") OR "patient") OR "patients") OR "syndrome") OR "symptom") OR "symptoms") OR "illness") OR "trait") OR "traits") OR "features")))) AND (((((((Hypertension[MeSH Terms]) OR "hypertension") OR "acute hypertension") OR "chronic hypertension") OR ("hypertensive") AND (((((((("emergency") OR "crisis") OR "patient") OR "patients") OR "urgency") OR "symptom") OR "symptoms")) OR ((("blood pressure") OR "high blood pressure") OR "elevated blood pressure")) OR (((("undetected") OR "undiagnosed") OR "underdiagnosed") OR "missed diagnosis")) AND (((((((Hypertension[MeSH Terms]) OR "hypertension") OR "acute hypertension") OR "chronic hypertension") OR ("hypertensive") AND (((((((("emergency") OR "crisis") OR "patient") OR "patients") OR "urgency") OR "symptom") OR "symptoms")) OR ((("blood pressure") OR "high blood pressure") OR "elevated blood pressure")))) Sort by: Author | 21 |
| #1<br>3 | Search (((((((Hypertension[MeSH Terms]) OR "hypertension") OR "acute hypertension") OR "chronic hypertension") OR ("hypertensive") AND (((((((("emergency") OR "crisis") OR "patient") OR "patients") OR "urgency") OR "symptom") OR "symptoms")) OR ((("blood pressure") OR "high blood pressure") OR "elevated blood pressure")) OR (((("undetected") OR "undiagnosed") OR "underdiagnosed") OR "missed diagnosis")) AND (((((((Hypertension[MeSH Terms]) OR "hypertension") OR "acute hypertension") OR "chronic hypertension") OR ("hypertensive") AND (((((((("emergency") OR "crisis") OR "patient") OR "patients") OR "urgency") OR "symptom") OR "symptoms")) OR ((("blood pressure") OR "high blood pressure") OR "elevated blood pressure")))) AND (((((((borderline personality disorder[MeSH Terms]) OR "borderline personality disorder"))) OR ("borderline personality") AND (((((((("disorder") OR "disease") OR "patient") OR "patients") OR "syndrome") OR "symptom") OR "symptoms") OR "illness") OR "trait") OR "traits") OR "features")))) OR (((("undetected") OR "undiagnosed") OR "underdiagnosed") OR "missed diagnosis")) AND (((borderline personality disorder[MeSH Terms]) OR "borderline personality disorder"))) OR ((("borderline personality") AND (((((((("disorder") OR "disease") OR "patient") OR "patients") OR "syndrome") OR "symptom") OR "symptoms") OR "illness") OR "trait") OR "traits") OR "features")))) Sort by: Author | 21 |

1. Banny, A.M., et al., Borderline personality features as a predictor of forms and functions of aggression during middle childhood: examining the roles of gender and physiological reactivity. *Dev Psychopathol*, 2014. 26(3): p. 789-804.
2. Chen, M.H., et al., Risk of stroke among patients with borderline personality disorder: A nationwide longitudinal study. *J Affect Disord*, 2017. 219: p. 80-85.
3. El-Gabalawy, R., L.Y. Katz, and J. Sareen, Comorbidity and associated severity of borderline personality disorder and physical health conditions in a nationally representative sample. *Psychosom Med*, 2010. 72(7): p. 641-7.
4. Eslami-Shahrbabaki, M., A. Fekrat, and S. Mazhari, A Study of the Prevalence of Psychiatric Disorders in Patients with Methamphetamine-Induced Psychosis. *Addict Health*, 2015. 7(1-2): p. 37-46.
5. Frankenburg, F.R. and M.C. Zanarini, The association between borderline personality disorder and chronic medical illnesses, poor health-related lifestyle choices, and costly forms of health care utilization. *J Clin Psychiatry*, 2004. 65(12): p. 1660-5.
6. Frankenburg, F.R. and M.C. Zanarini, Obesity and obesity-related illnesses in borderline patients. *J Pers Disord*, 2006. 20(1): p. 71-80.
7. Gale, C.R., et al., Pleiotropy between neuroticism and physical and mental health: findings from 108 038 men and women in UK Biobank. *Transl Psychiatry*, 2016. 6: p. e791.



8. Galle, F., et al., Does Post-operative Psychotherapy Contribute to Improved Comorbidities in Bariatric Patients with Borderline Personality Disorder Traits and Bulimia Tendencies? A Prospective Study. *Obes Surg*, 2017. 27(7): p. 1872-1878.
9. Garganeeva, N.P., et al., [Arterial hypertension as a psychosomatic problem]. *Klin Med (Mosk)*, 2004. 82(1): p. 35-41.
10. Golubev, M.V., T.A. Aivazian, and V.P. Zaitsev, [The efficacy of psychotherapy with biofeedback in the rehabilitation of hypertension patients]. *Vopr Kurortol Fizioter Lech Fiz Kult*, 1998(6): p. 16-8.
11. Krol, C.G. and M.J. Janssen, [Unusual use of nutmeg]. *Ned Tijdschr Geneesk*, 2010. 154: p. A2214.
12. Kuzman, M.R., et al., Psychiatric symptoms in idiopathic intracranial hypertension. *Psychiatry Clin Neurosci*, 2008. 62(3): p. 367.
13. Liebowitz, M.R., et al., Reversible and irreversible monoamine oxidase inhibitors in other psychiatric disorders. *Acta Psychiatr Scand Suppl*, 1990. 360: p. 29-34.
14. Lobbestael, J., et al., Effects of induced anger in patients with antisocial personality disorder. *Psychol Med*, 2009. 39(4): p. 557-68.
15. Metzler, W., R. Wronski, and B. Bewig, [The lethal ingestion of cigarettes in adults: does it really exist?]. *Dtsch Med Wochenschr*, 2005. 130(24): p. 1491-3.
16. Moran, P., et al., Personality disorder and cardiovascular disease: results from a national household survey. *J Clin Psychiatry*, 2007. 68(1): p. 69-74.
17. Philipsen, A., et al., Clonidine in acute aversive inner tension and self-injurious behavior in female patients with borderline personality disorder. *J Clin Psychiatry*, 2004. 65(10): p. 1414-9.
18. Schmahl, C.G., et al., Psychophysiological reactivity to traumatic and abandonment scripts in borderline personality and posttraumatic stress disorders: a preliminary report. *Psychiatry Res*, 2004. 126(1): p. 33-42.
19. Schrooten, M., et al., Normalization of 14-3-3 in CJD. *Acta Neurol Belg*, 2008. 108(2): p. 64-6.
20. Schulz, B.M. and R.J. Strauch, A case of factitious subfascial emphysema. *Orthopedics*, 2008. 31(5): p. 495.
21. Wingefeld, K., et al., Effects of mineralocorticoid receptor stimulation via fludrocortisone on memory in women with borderline personality disorder. *Neurobiol Learn Mem*, 2015. 120: p. 94-100.

## PsycINFO

Database: PsycINFO <1806 to September Week 1 2018>

Search Strategy:

-----  
1 borderline personality disorder.mp. or exp Borderline Personality Disorder/ (9701)  
2 ("borderline personality disorder" or ("borderline personality" and ("disorder" or "disease" or "patient" or "patients" or "syndrome" or "symptom" or "symptoms" or "illness" or "trait" or "traits" or "features"))).mp. [mp=title, abstract, heading word, table of contents, key concepts, original title, tests & measures] (10797)  
3 ("undetected" or "undiagnosed" or "underdiagnosed" or "missed diagnosis").mp. [mp=title, abstract, heading word, table of contents, key concepts, original title, tests & measures] (4752)  
4 exp ESSENTIAL HYPERTENSION/ or exp HYPERTENSION/ or hypertension.mp. (15771)  
5 ("hypertension" or "acute hypertension" or "chronic hypertension" or ("hypertensive" and ("emergency" or "crisis" or "patient" or "patients" or "urgency" or "symptom" or "symptoms"))) or "blood pressure" or "high blood pressure" or "elevated blood pressure" or "blood pressure disease" or "blood pressure disorder").mp. [mp=title, abstract, heading word, table of contents, key concepts, original title, tests & measures] (31176)  
6 1 or 2 (10797)  
7 3 and 6 (20)  
8 6 or 7 (10797)  
9 4 or 5 (31176)  
10 3 and 9 (138)  
11 9 or 10 (31176)  
12 8 and 11 (23)

\*\*\*\*\*

1. Banny, A.M., et al., Borderline personality features as a predictor of forms and functions of aggression during middle childhood: Examining the roles of gender and physiological reactivity. *Development and Psychopathology*, 2014. 26(3): p. 789-804.
2. Blechman, E.A. and K.D. Brownell, Behavioral medicine and women: A comprehensive handbook. (1998) *Behavioral medicine and women: A comprehensive handbook xxxiii*, 876 pp New York, NY, US: Guilford Press; US, 1998.
3. Bohinc, R., R.A. Sansone, and S. McDonald, Multiple invasive procedures in a patient with borderline personality: A relationship? *Innovations in Clinical Neuroscience*, 2014. 11(3-4): p. 10-11.
4. Chen, M.-H., et al., Risk of stroke among patients with borderline personality disorder: A nationwide longitudinal study. *Journal of Affective Disorders*, 2017. 219: p. 80-85.
5. Eddie, D., Borderline personality disorder, co-occurring substance use, and autonomic dysregulation. *Dissertation Abstracts International: Section B: The Sciences and Engineering*, 2018. 78(8-B(E)): p. No Pagination Specified.
6. El-Gabalawy, R., L.Y. Katz, and J. Sareen, Comorbidity and associated severity of borderline personality disorder and physical health conditions in a nationally representative sample. *Psychosomatic Medicine*, 2010. 72(7): p. 641-647.
7. Fahrenberg, J. and M. Myrtek, Progress in ambulatory assessment: Computer-assisted psychological and psychophysiological methods in monitoring and field studies. (2001) *Progress in ambulatory assessment: Computer-assisted psychological and psychophysiological methods in monitoring and field studies x*, 627 pp Ashland, OH, US: Hogrefe & Huber Publishers; US, 2001.

8. Fink, G., Stress consequences: Mental, neuropsychological and socioeconomic. (2010) Stress consequences: Mental, neuropsychological and socioeconomic xxiii, 756 pp San Diego, CA, US: Elsevier Academic Press; US, 2010.
9. Frankenburg, F.R. and M.C. Zanarini, The Association Between Borderline Personality Disorder and Chronic Medical Illnesses, Poor Health-Related Lifestyle Choices, and Costly Forms of Health Care Utilization. *The Journal of Clinical Psychiatry*, 2004. 65(12): p. 1660-1665.
10. Frankenburg, F.R. and M.C. Zanarini, Obesity and Obesity-Related Illnesses in Borderline Patients. *Journal of Personality Disorders*, 2006. 20(1): p. 71-80.
11. Gordon, D.K. and R.A. Sansone, A relationship between factitious disorder and borderline personality disorder. *Innovations in Clinical Neuroscience*, 2013. 10(11-12): p. 11-13.
12. Grove, J.L., et al., Borderline personality features, interpersonal correlates, and blood pressure response to social stressors: Implications for cardiovascular risk. *Personality and Individual Differences*, 2017. 113: p. 38-47.
13. Liebowitz, M.R., et al., Reversible and irreversible monoamine oxidase inhibitors in other psychiatric disorders. *Acta Psychiatrica Scandinavica*, 1990. 82(360, Suppl): p. 29-34.
14. Moran, P., et al., Personality disorder and cardiovascular disease: Results from a national household survey. *The Journal of Clinical Psychiatry*, 2007. 68(1): p. 69-74.
15. Oltmanns, T.F., et al., Case studies in abnormal psychology., 7th ed. (2007) Case studies in abnormal psychology ix, 381 pp Hoboken, NJ, US: John Wiley & Sons Inc; US, 2007.
16. Oltmanns, T.F., J.M. Neale, and G.C. Davison, Case studies in abnormal psychology., 3rd ed. (1991) Case studies in abnormal psychology ix, 341 pp Oxford, England: John Wiley & Sons; England, 1991.
17. Oltmanns, T.F., J.M. Neale, and G.C. Davison, Case studies in abnormal psychology., 4th ed. (1995) Case studies in abnormal psychology viii, 407 pp Oxford, England: John Wiley & Sons; England, 1995.
18. Oltmanns, T.F., J.M. Neale, and G.C. Davison, Case studies in abnormal psychology., 5th ed. (1999) Case studies in abnormal psychology xi, 399 pp Hoboken, NJ, US: John Wiley & Sons Inc; US, 1999.
19. Philipsen, A., et al., Clonidine in Acute Aversive Inner Tension and Self-Injurious Behavior in Female Patients With Borderline Personality Disorder. *The Journal of Clinical Psychiatry*, 2004. 65(10): p. 1414-1419.
20. Reinagel-Canarelli, D.C., Dive reflex induction: Regulating emotion in individuals with eating disorders. *Dissertation Abstracts International: Section B: The Sciences and Engineering*, 2018. 79(3-B(E)): p. No Pagination Specified.
21. Schmahl, C.G., B.M. Elzinga, and J. Bremner, Individual differences in psychophysiological reactivity in adults with childhood abuse. *Clinical Psychology & Psychotherapy*, 2002. 9(4): p. 271-276.
22. Schmahl, C.G., et al., Psychophysiological reactivity to traumatic and abandonment scripts in borderline personality and posttraumatic stress disorders: A preliminary report. *Psychiatry Research*, 2004. 126(1): p. 33-42.
23. Zieg, J., et al., Nephrotic syndrome and acute kidney injury in a patient treated with lithium carbonate. *Australasian Psychiatry*, 2014. 22(6): p. 591-592.

## Results of combined searches when duplicates removed

1. Afifi, M., Psychiatric morbidity in patients referred to an insomnia clinic [1]. *Singapore Medical Journal*, 2007. 48(5): p. 479-480.
2. Agarwal, L.J., C.E. Berger, and L. Gill, Naltrexone for severe self-harm behavior: A case report. *American Journal of Psychiatry*, 2011. 168(4): p. 437-438.
3. Al'Absi, M. and W.R. Lovallo, Cortisol concentrations in serum of borderline hypertensive men exposed to a novel experimental setting. *Psychoneuroendocrinology*, 1993. 18(5-6): p. 355-363.
4. Anglin, R.E., et al., The psychiatric manifestations of mitochondrial disorders: A case and review of the literature. *Journal of Clinical Psychiatry*, 2012. 73(4): p. 506-512.
5. Ansermot, N., et al., Severe manic episode associated with tramadol in a patient with recurrent depressive disorder. *Journal of Clinical Psychopharmacology*, 2015. 35(2): p. 203-204.
6. Argentieri, M.A., et al., Epigenetic Pathways in Human Disease: The Impact of DNA Methylation on Stress-Related Pathogenesis and Current Challenges in Biomarker Development. *EBioMedicine*, 2017. 18: p. 327-350.
7. Balon, R., Quo vadis, Psychiatry? *Current Psychiatry*, 2016. 15(2): p. 25 and 39.
8. Balon, R., Clinical Factor 2016. *Psychotherapy and Psychosomatics*, 2017. 86(6): p. 323-331.
9. Bandali, F., Z. Thomas, and Y. Gozzo, Conservative management of massive rivaroxaban and enoxaparin overdose. *Critical Care Medicine*, 2014. 42(12): p. A1642.
10. Banny, A.M., et al., Borderline personality features as a predictor of forms and functions of aggression during middle childhood: Examining the roles of gender and physiological reactivity. *Development and Psychopathology*, 2014. 26(3): p. 789-804.
11. Bates, D. and B. Caton, Metformin overdose [2]. *Canadian Journal of Hospital Pharmacy*, 1999. 52(3): p. 173-175.
12. Baweja, R., R. Baweja, and A. Hameed, Munchausen's syndrome with rare hematological disorder, systemic mastocytosis: A case report. *Journal of Neuropsychiatry and Clinical Neurosciences*, 2013. 25(3): p. E35-E38.
13. Beck, A.T. and D.J.A. Dozois, Cognitive therapy: Current status and future directions. 2011. p. 397-409.
14. Bitter, R., T.L. Demler, and L. Opler, Safety evaluation of the concomitant use of clozapine and benzodiazepines: A retrospective, cross-sectional chart review. *Journal of Psychiatric Practice*, 2008. 14(5): p. 265-270.
15. Black, D.W., et al., Comparison of low and moderate dosages of extended-release quetiapine in borderline personality disorder: a randomized, double-blind, placebo-controlled trial. *American journal of psychiatry*, 2014. 171(11): p. 1174-1182.
16. Blechman, E.A. and K.D. Brownell, Behavioral medicine and women: A comprehensive handbook. (1998) Behavioral medicine and women: A comprehensive handbook xxxiii, 876 pp New York, NY, US: Guilford Press; US, 1998.
17. Bohinc, R.J., R.A. Sansone, and S. McDonald, Multiple invasive procedures in a patient with borderline personality: A relationship? *Innovations in Clinical Neuroscience*, 2014. 11(3-4): p. 10-11.
18. Boon, D., R.A. Kraaijenhagen, and G.A. Van Montfrans, Factitious pheochromocytoma-like hypertensive bouts caused by the valsalva maneuver [11]. *Annals of Internal Medicine*, 2001. 135(4): p. 304-305.

19. Bowditch, J., R. Russell, and S. McCready, General anaesthesia for caesarean section in a woman with tuberous sclerosis. *International Journal of Obstetric Anesthesia*, 2017. 31: p. 110-111.
20. Buist, A.E. and J. Bilszta, Perinatal mental illness: Identifying and managing women at risk. *Medicine Today*, 2011. 12(1): p. 64-68.
21. Chapman, C.D., et al., Intranasal treatment of central nervous system dysfunction in humans. *Pharmaceutical Research*, 2013. 30(10): p. 2475-2484.
22. Chen, M.-H., et al., Risk of stroke among patients with borderline personality disorder: A nationwide longitudinal study. *Journal of Affective Disorders*, 2017. 219: p. 80-85.
23. Citrome, L., Binge-eating disorder and comorbid conditions: Differential diagnosis and implications for treatment. *Journal of Clinical Psychiatry*, 2017. 78: p. 9-13.
24. Collin-Lévesque, L., et al., Infant Exposure to Methylphenidate and Duloxetine during Lactation. *Breastfeeding Medicine*, 2018. 13(3): p. 221-225.
25. Cornett, E.M., et al., Medication-induced tardive dyskinesia: A review and update. *Ochsner Journal*, 2017. 17(2): p. 162-174.
26. Cortazar, F., et al., Clinical outcomes in kidney transplant recipients receiving long-term therapy with inhibitors of the mammalian target of rapamycin. *American Journal of Transplantation*, 2012. 12(2): p. 379-387.
27. Cuadra, R.H. and W.B. White, Severe and refractory hypertension in a young woman. *Journal of the American Society of Hypertension*, 2016. 10(6): p. 506-509.
28. Danilov, D.S., The efficacy and tolerability of pericyazine in the treatment of patients with schizotypal disorder, organic personality disorders and pathocharacterological changes within personality disorders. *Zhurnal Nevrologii i Psihiatrii imeni S.S. Korsakova*, 2017. 117(10): p. 65-71.
29. De Faire, U., K. Lindvall, and B. Nilsson, Noninvasive ambulatory 24 h blood pressures and basal blood pressures predict development of sustained hypertension from a borderline state. *American Journal of Hypertension*, 1993. 6(2): p. 149-155.
30. Drummond, P.D., Cardiovascular reactivity in borderline hypertensives during behavioural and orthostatic stress. *Psychophysiology*, 1985. 22(6): p. 621-628.
31. Dullur, P., V. Eapen, and T. Trapolini, Metabolic syndrome in an adolescent psychiatric unit. *Australasian Psychiatry*, 2012. 20(5): p. 444-445.
32. Durham, J.D., R.R. Arthur Grube, and S.H. Fuller, Borderline personality disorder. 2007. p. 52-58.
33. Durmaz, O., Finding the right balance between clinical efficacy and side effects in second generation antipsychotics. *Klinik Psikofarmakoloji Bulteni*, 2016. 26(1): p. 89-90.
34. Eddie, D., Borderline personality disorder, co-occurring substance use, and autonomic dysregulation. *Dissertation Abstracts International: Section B: The Sciences and Engineering*, 2018. 78(8-B(E)): p. No Pagination Specified.
35. El-Gabalawy, R., L.Y. Katz, and J. Sareen, Comorbidity and associated severity of borderline personality disorder and physical health conditions in a nationally representative sample. *Psychosomatic Medicine*, 2010. 72(7): p. 641-647.
36. Elgarov, A.A., et al., Epidemiology of ischemic heart disease and atherosclerosis risk factors in imprisoned men. *Russian Journal of Cardiology*, 2015. 122(6): p. 42-47.
37. Eslami-Shahrbabaki, M., A. Fekrat, and S. Mazhari, A Study of the Prevalence of Psychiatric Disorders in Patients with Methamphetamine-Induced Psychosis. *Addiction & Health*, 2015. 7(1-2): p. 37-46.

38. Fahrenberg, J. and M. Myrtek, Progress in ambulatory assessment: Computer-assisted psychological and psychophysiological methods in monitoring and field studies. (2001) Progress in ambulatory assessment: Computer-assisted psychological and psychophysiological methods in monitoring and field studies x, 627 pp Ashland, OH, US: Hogrefe & Huber Publishers; US, 2001.
39. Faith, M.S., P.E. Matz, and M.A. Jorge, Obesity - Depression associations in the population. Journal of Psychosomatic Research, 2002. 53(4): p. 935-942.
40. Falkai, P. and H.J. Möller, Mood disorders in the light of genes, comorbidity and contemporary treatment. European Archives of Psychiatry and Clinical Neuroscience, 2011. 261(8): p. 531-532.
41. Fawcett, J., Why aren't MAOIs used more often? Journal of Clinical Psychiatry, 2009. 70(1): p. 139-140.
42. Fink, G., Stress consequences: Mental, neuropsychological and socioeconomic. (2010) Stress consequences: Mental, neuropsychological and socioeconomic xxiii, 756 pp San Diego, CA, US: Elsevier Academic Press; US, 2010.
43. Foti, M.E., et al., Borderline personality disorder: Considerations for inclusion in the Massachusetts Parity List of "Biologically-based" disorders. Psychiatric Quarterly, 2011. 82(2): p. 95-112.
44. Frankenburg, F.R. and M.C. Zanarini, The Association Between Borderline Personality Disorder and Chronic Medical Illnesses, Poor Health-Related Lifestyle Choices, and Costly Forms of Health Care Utilization. The Journal of Clinical Psychiatry, 2004. 65(12): p. 1660-1665.
45. Frankenburg, F.R. and M.C. Zanarini, Obesity and Obesity-Related Illnesses in Borderline Patients. Journal of Personality Disorders, 2006. 20(1): p. 71-80.
46. Franklin, C., et al., Ulcerated necrobiosis lipidica as a rare cause for chronic leg ulcers: Case report series of ten patients. International Wound Journal, 2015. 12(5): p. 548-554.
47. Franklin, L.D. and S.A. Swan, Psychodynamic Treatment of Excessive Virtual Reality Environment Use. Clinical Case Studies, 2015. 14(6): p. 482-493.
48. Franz, I.W., Investigations of the blood pressure during and after ergometric work in borderline hypertensives in comparison with normal subjects and patients with stable hypertension. Zeitschrift für Kardiologie, 1979. 68(2): p. 107-115.
49. Gagnon, J. and S. Daelman, An empirical study of the psychodynamics of borderline impulsivity: A preliminary report. Psychoanalytic Psychology, 2011. 28(3): p. 341-362.
50. Gale, C.R., et al., Pleiotropy between neuroticism and physical and mental health: findings from 108 038 men and women in UK Biobank. Transl Psychiatry, 2016. 6: p. e791.
51. Galle, F., et al., Does Post-operative Psychotherapy Contribute to Improved Comorbidities in Bariatric Patients with Borderline Personality Disorder Traits and Bulimia Tendencies? A Prospective Study. Obesity Surgery, 2017. 27(7): p. 1872-1878.
52. Garganeeva, N.P., et al., [Arterial hypertension as a psychosomatic problem]. Klinicheskaia Meditsina, 2004. 82(1): p. 35-41.
53. Garganeeva, N.P., et al., Arterial hypertension as a psychosomatic problem. Klinicheskaia meditsina, 2004. 82(1): p. 35-41.
54. Garganeyeva, N.P., et al., Disorders of neurotic and affective level in assessment of cardio-vascular risk in patients with arterial hypertension. European Neuropsychopharmacology, 2009. 19: p. S702-S703.
55. Geiss, L., et al., Reduced autonomic modulation of blood pressure and shifted sympatho-vagal balance in borderline personality disorder. Neurology Psychiatry and Brain Research, 2018. 29: p. 9.

56. Gjone, H. and V.B. Wyller, Chronic fatigue in adolescence - Autonomic dysregulation and mental health: An exploratory study. *Acta Paediatrica, International Journal of Paediatrics*, 2009. 98(8): p. 1313-1318.
57. Goedhard, L.E., et al., Pharmacotherapy for the treatment of aggressive behavior in general adult psychiatry: A systematic review. *Journal of Clinical Psychiatry*, 2006. 67(7): p. 1013-1024.
58. Goethe, J.W., B.L. Szarek, and C.F. Caley, Metabolic syndrome in psychiatric inpatients treated for depression. 2009. p. 90-104.
59. Golubev, M.V., T.A. Aïvazian, and V.P. Zaitsev, The efficacy of psychotherapy with biofeedback in the rehabilitation of hypertension patients. *Voprosy kurortologii, fizioterapii, i lechebnoi fizicheskoi kultury*, 1998(6): p. 16-18.
60. Gordon, A., et al., Prescribing opioids for chronic noncancer pain in primary care: Risk assessment. *Postgraduate Medicine*, 2014. 126(5): p. 159-166.
61. Gordon, D.K. and R.A. Sansone, A relationship between factitious disorder and borderline personality disorder. *Innovations in Clinical Neuroscience*, 2013. 10(11-12): p. 11-13.
62. Greggersen, W., et al., Intima-media thickness in women with borderline personality disorder. *Psychosomatic Medicine*, 2011. 73(7): p. 627-632.
63. Greggersen, W., et al., Major depression, borderline personality disorder, and visceral fat content in women. *European Archives of Psychiatry and Clinical Neuroscience*, 2011. 261(8): p. 551-557.
64. Grgas, M., Treatment of tardive akathisia associated with clozapine with high dose propranolol. *Journal of Pharmacy Practice*, 2016. 29(3): p. 341.
65. Grove, J.L., et al., Borderline personality features, interpersonal correlates, and blood pressure response to social stressors: Implications for cardiovascular risk. *Personality and Individual Differences*, 2017. 113: p. 38-47.
66. Grove, J.L., T.W. Smith, and K.D. Jordan, BPD symptomatology and risk for cardiovascular disease: Heightened physiological reactivity as a mechanism. *Psychosomatic Medicine*, 2014. 76(3): p. A-43.
67. Gunderson, J.G., Borderline personality disorder. *New England Journal of Medicine*, 2011. 364(21): p. 2037-2042.
68. Gupta, S., et al., Functional pituitary tumors masquerading as primary glaucoma and effect of hypophysectomy on intraocular tension. *Journal of Glaucoma*, 2015. 24(3): p. e7-e13.
69. Ho, C.S.H., et al., Metabolic syndrome in psychiatry: Advances in understanding and management. *Advances in Psychiatric Treatment*, 2014. 20(2): p. 101-112.
70. Hughes, A. and S. Mazor, Truth is stranger than Pulp Fiction: A shot of adrenaline and a broken heart. *Clinical Toxicology*, 2017. 55(7): p. 775-776.
71. Jain, S., et al., Polycystic ovarian syndrome in borderline personality disorder. *Indian Journal of Psychiatry*, 2015. 57(5): p. S73.
72. John, A.P., et al., Prevalence of metabolic syndrome among Australians with severe mental illness. *Medical Journal of Australia*, 2009. 190(4): p. 176-179.
73. Kahl, K.G., et al., Visceral fat deposition and insulin sensitivity in depressed women with and without comorbid borderline personality disorder. *Psychosomatic Medicine*, 2005. 67(3): p. 407-412.
74. Kahl, K.G., et al., Prevalence of the metabolic syndrome in patients with borderline personality disorder: Results from a cross-sectional study. *European Archives of Psychiatry and Clinical Neuroscience*, 2013. 263(3): p. 205-213.

75. Kambhampati, R., A. Khan, and M. Patel, Drug reaction dressed up as severe sepsis. *Journal of General Internal Medicine*, 2015. 30: p. S390.
76. Kataoka, J. and S. Suzaki, Severe carbamazepine poisoning managed with charcoal hemoperfusion and multiple-dose activated charcoal. *Critical Care Medicine*, 2012. 40(12): p. 302.
77. Kato, M. and T. Atsumi, Pulmonary arterial hypertension associated with connective tissue diseases: A review focusing on distinctive clinical aspects. *European Journal of Clinical Investigation*, 2018. 48(2).
78. Keeris, L., et al., Fatal hypoglycemia; CT and MR findings of the brain. *Intensive Care Medicine*, 2009. 35: p. S140.
79. Krol, C.G. and M.J. Janssen, [Unusual use of nutmeg]. *Nederlands Tijdschrift voor Geneeskunde*, 2010. 154: p. A2214.
80. Kuzman, M.R., et al., Psychiatric symptoms in idiopathic intracranial hypertension. *Psychiatry & Clinical Neurosciences*, 2008. 62(3): p. 367.
81. Lacy, T.J. and M.J. Higgins, Integrated medical-psychiatric care of a dying borderline patient: A case of dynamically informed "practical psychotherapy". *Journal of the American Academy of Psychoanalysis and Dynamic Psychiatry*, 2005. 33(4): p. 619-636.
82. Ladea, M., et al., Acute psychotic disorder due to the use of ethnobotanical substances. *European Neuropsychopharmacology*, 2010. 20: p. S606.
83. Lantz, M.S., Borderline personality disorder in an older woman. *Clinical Geriatrics*, 2009. 17(6): p. 9-12.
84. Larrivé, M.P., Borderline personality disorder in adolescents: The He-who-must-not-be-named of psychiatry. *Dialogues in Clinical Neuroscience*, 2013. 15(2): p. 171-179.
85. Liebowitz, M.R., et al., Reversible and irreversible monoamine oxidase inhibitors in other psychiatric disorders. *Acta Psychiatrica Scandinavica*, 1990. 82(360, Suppl): p. 29-34.
86. Lipinski, M.J., et al., An unusual presentation of ehlers-danlos syndrome vascular type with deep vein thrombosis: A case for multidisciplinary management. *American Journal of Medical Genetics, Part A*, 2009. 149(4): p. 698-701.
87. Lobbstaël, J., et al., Effects of induced anger in patients with antisocial personality disorder. *Psychological Medicine*, 2009. 39(4): p. 557-68.
88. Manickam, B., et al., Relationship between glycated hemoglobin and circulating 25-hydroxyvitamin D concentration in African American and Caucasian American men. *Endocrine Practice*, 2013. 19(1): p. 73-80.
89. Marginean, C.N., et al., Case-report of Acute intermittent porphyria presenting with behavioral disturbances. *European Neuropsychopharmacology*, 2008. 18(S4): p. S580-S581.
90. Martinez-Raga, J., et al., Risk of serious cardiovascular problems with medications for attention-deficit hyperactivity disorder. *CNS Drugs*, 2013. 27(1): p. 15-30.
91. Mehrmann, C. and R. Karmacharya, Principles and neurobiological correlates of concentrative, diffuse, and insight meditation. *Harvard Review of Psychiatry*, 2013. 21(4): p. 205-218.
92. Meng, L., et al., Original rat model of high kinetic unilateral pulmonary hypertension surgically induced by combined surgery. *Journal of Thoracic and Cardiovascular Surgery*, 2013. 146(5): p. 1220-1226.e1.
93. Metzler, W., R. Wronski, and B. Bewig, [The lethal ingestion of cigarettes in adults: does it really exist?]. *Deutsche Medizinische Wochenschrift*, 2005. 130(24): p. 1491-3.
94. Milano, G., et al., Clinical experience about an unexpected adverse event during nalmefene treatment in two patients with alcohol use disorder. *Journal of Clinical Pharmacy and Therapeutics*, 2016. 41(1): p. 97-100.



95. Miyake, N., et al., X-linked hypomyelination with spondylometaphyseal dysplasia (H-SMD) associated with mutations in AIFM1. *Neurogenetics*, 2017. 18(4): p. 185-194.
96. Mohammadi, D., Gisèle Apter: Thinking in twos and threes. *The Lancet Psychiatry*, 2016. 3(3): p. 209.
97. Moran, P., et al., Personality disorder and cardiovascular disease: Results from a national household survey. *The Journal of Clinical Psychiatry*, 2007. 68(1): p. 69-74.
98. Morrison, M.L., et al., Prevalence of left ventricular hypertrabeculation/noncompaction among children with sickle cell disease. *Congenital Heart Disease*, 2018. 13(3): p. 440-443.
99. Morrison, R.L. and A.S. Bellack, Role of social competence in borderline essential hypertension. *Journal of Consulting and Clinical Psychology*, 1985. 53(2): p. 248-255.
100. Munro, J., et al., Relaxin polymorphisms associated with metabolic disturbance in patients treated with antipsychotics. *Journal of Psychopharmacology*, 2012. 26(3): p. 374-379.
101. Mushtaq, R., et al., Relationship between loneliness, Psychiatric disorders and physical health ? A review on the psychological aspects of loneliness. *Journal of Clinical and Diagnostic Research*, 2014. 8(9): p. WE01-WE04.
102. Naguy, A. and D. El-Sori, Metformin for Antipsychotic-Related Metabolic Syndrome in Children: Fact or Fiction? *Chinese Medical Journal*, 2018. 131(12): p. 1490-1491.
103. Nasrallah, H.A., Pleiotropy of psychiatric disorders will reinvent DSM. *Current Psychiatry*, 2013. 12(4): p. 6-7.
104. Nct, Clinical Research Study to Evaluate Selegiline in the Treatment of Borderline Personality Disorder. <https://clinicaltrials.gov/show/nct01912391>, 2013.
105. Oltmanns, T.F., et al., Case studies in abnormal psychology., 7th ed. (2007) Case studies in abnormal psychology ix, 381 pp Hoboken, NJ, US: John Wiley & Sons Inc; US, 2007.
106. Oltmanns, T.F., J.M. Neale, and G.C. Davison, Case studies in abnormal psychology., 3rd ed. (1991) Case studies in abnormal psychology ix, 341 pp Oxford, England: John Wiley & Sons; England, 1991.
107. Oltmanns, T.F., J.M. Neale, and G.C. Davison, Case studies in abnormal psychology., 4th ed. (1995) Case studies in abnormal psychology viii, 407 pp Oxford, England: John Wiley & Sons; England, 1995.
108. Oltmanns, T.F., J.M. Neale, and G.C. Davison, Case studies in abnormal psychology., 5th ed. (1999) Case studies in abnormal psychology xi, 399 pp Hoboken, NJ, US: John Wiley & Sons Inc; US, 1999.
109. Osman, O.T., et al., The psychiatric aspects of skin disorders. *Expert Review of Dermatology*, 2011. 6(2): p. 195-209.
110. Osview, F., Antiepileptic drugs in psychiatry. *Journal of Neurology, Neurosurgery and Psychiatry*, 2004. 75(12): p. 1655-1658.
111. Pallarés-Carratalá, V. and R. Pascual Pérez, Non-compliance and therapeutic inertia: Two unanswered questions in clinical practice. *Current Medical Research and Opinion*, 2014. 30(5): p. 839-840.
112. Pattishall, A.E., S.B. Ellen, and N.D. Spector, Bullying, adverse childhood experiences and use of texting to promote behavior change. *Current Opinion in Pediatrics*, 2013. 25(6): p. 748-754.
113. Peterhänsel, C., et al., Obesity and co-morbid psychiatric disorders as contraindications for bariatric surgery? - A case study. *International Journal of Surgery Case Reports*, 2014. 5(12): p. 1268-1270.
114. Philipsen, A., et al., Clonidine in Acute Aversive Inner Tension and Self-Injurious Behavior in Female Patients With Borderline Personality Disorder. *The Journal of Clinical Psychiatry*, 2004. 65(10): p. 1414-1419.

115. Pittenger, C., et al., Riluzole in the treatment of mood and anxiety disorders. *CNS Drugs*, 2008. 22(9): p. 761-786.
116. Posse, P.R., et al., Cardiovascular effects of intravenous ketamine for depression: Analysis of 684 consecutive infusions. *Neuropsychopharmacology*, 2017. 43: p. S168.
117. Pouwer, F., et al., Schizophrenia, syndrome X, and omega-3 fatty acids [3]. *American Journal of Psychiatry*, 2004. 161(10): p. 1926.
118. Raffai, G., et al., Experimental orthostasis elicits sustained hypertension, which can be prevented by sympathetic blockade in the rat. *Journal of Cardiovascular Pharmacology*, 2005. 45(4): p. 354-361.
119. Reinagel-Canarelli, D.C., Dive reflex induction: Regulating emotion in individuals with eating disorders. *Dissertation Abstracts International: Section B: The Sciences and Engineering*, 2018. 79(3-B(E)): p. No Pagination Specified.
120. Reynolds, D., et al., Ipsapirone as a serotonergic probe in personality disorder patients. *Biological psychiatry*, 2000. 47(8 Suppl 1): p. S144.
121. Safar, M.E., Y.A. Weiss, and G.M. London, Cardiopulmonary blood volume in borderline hypertension. *Clinical Science and Molecular Medicine*, 1974. 47(2): p. 153-164.
122. Samardzic, R., Posttraumatic depression: Issue of comorbidity. *European Psychiatry*, 2012. 27.
123. Savage, S.E., On medication through adolescence after transplantation. *Chronic Illness*, 2010. 6(4): p. 317-319.
124. Schaffer, A., et al., A review of factors associated with greater likelihood of suicide attempts and suicide deaths in bipolar disorder: Part II of a report of the International Society for Bipolar Disorders Task Force on Suicide in Bipolar Disorder. *Australian and New Zealand Journal of Psychiatry*, 2015. 49(11): p. 1006-1020.
125. Schmahl, C.G., B.M. Elzinga, and J. Bremner, Individual differences in psychophysiological reactivity in adults with childhood abuse. *Clinical Psychology & Psychotherapy*, 2002. 9(4): p. 271-276.
126. Schmahl, C.G., et al., Psychophysiological reactivity to traumatic and abandonment scripts in borderline personality and posttraumatic stress disorders: a preliminary report. *Psychiatry Research*, 2004. 126(1): p. 33-42.
127. Schmitt, A. and P. Falkai, Risk genes, metabolic syndrome and eye tracking deficits in psychiatric diseases. *European Archives of Psychiatry and Clinical Neuroscience*, 2013. 263(3): p. 177-179.
128. Schrooten, M., et al., Normalization of 14-3-3 in CJD. *Acta Neurologica Belgica*, 2008. 108(2): p. 64-6.
129. Schulz, B.M. and R.J. Strauch, A case of factitious subfascial emphysema. *Orthopedics*, 2008. 31(5): p. 495.
130. Shankar, K., et al., Eating behaviors in borderline personality disorder and its association with metabolic abnormalities. *Indian Journal of Psychiatry*, 2014. 56: p. S52.
131. Short, J., Women. *Criminal Behaviour and Mental Health*, 2004. 14(2 SPEC. SUPPL.): p. S48-S50.
132. So, Y.T., Immune-mediated neuropathies. *CONTINUUM Lifelong Learning in Neurology*, 2012. 18(1): p. 85-105.
133. Stock, S., et al., Risk factors for the prescription of potentially inappropriate medication (PIM) in the elderly: An analysis of sickness fund routine claims data from Germany. *Wiener Klinische Wochenschrift*, 2014. 126(19-20): p. 604-612.
134. Stoner, S.C., et al., Levetiracetam for mood stabilization and maintenance of seizure control following multiple treatment failure. *Annals of Pharmacotherapy*, 2005. 39(11): p. 1928-1931.

135. Tyrka, A.R., et al., The neurobiological correlates of childhood adversity and implications for treatment. *Acta Psychiatrica Scandinavica*, 2013. 128(6): p. 434-447.
136. van Meerkerk-Aanen, P.J., et al., La belle indifférence revisited: A case report on progressive supranuclear palsy misdiagnosed as conversion disorder. *Neuropsychiatric Disease and Treatment*, 2017. 13: p. 2057-2067.
137. Van Merode, T., et al., Local inhomogeneities in wall distensibility in the carotid artery bifurcation in borderline hypertensives. *Journal of Hypertension*, 1991. 9(SUPPL. 6): p. S118-S119.
138. Vukić, V., D. Karlović, and D. Buljan, Past research and cognitions of quetiapine use in the treatment of Alcohol dependence. *Alcoholism*, 2011. 47(1): p. 43-52.
139. Weidmann, P. and Z. Gluck, Borderline hypertension. *Schweizerische Medizinische Wochenschrift*, 1979. 109(12): p. 417-422.
140. White, H.L. and J.A. Ascher, Preclinical and early clinical studies with BW 1370U87, a reversible competitive monoamine oxidase-A inhibitor. *Clinical Neuropharmacology*, 1993. 16(SUPPL. 2): p. S25-S33.
141. Wingenfeld, K., et al., Effects of mineralocorticoid receptor stimulation via fludrocortisone on memory in women with borderline personality disorder. *Neurobiology of Learning & Memory*, 2015. 120: p. 94-100.
142. Wong, L.Y., et al., Severe Hypertension and Bradycardia Secondary to Midodrine Overdose. *Journal of Medical Toxicology*, 2017. 13(1): p. 88-90.
143. Zieg, J., et al., Nephrotic syndrome and acute kidney injury in a patient treated with lithium carbonate. *Australasian Psychiatry*, 2014. 22(6): p. 591-592.
